# Supplementary material
Source: PubMed Central journal article supplement (PMC9730060)
Supplement: ajtr0014-8243-f3.pdf [file ajtr0014-8243-f3.pdf]

# High prevalence and molecular characterization of *Staphylococcus aureus*

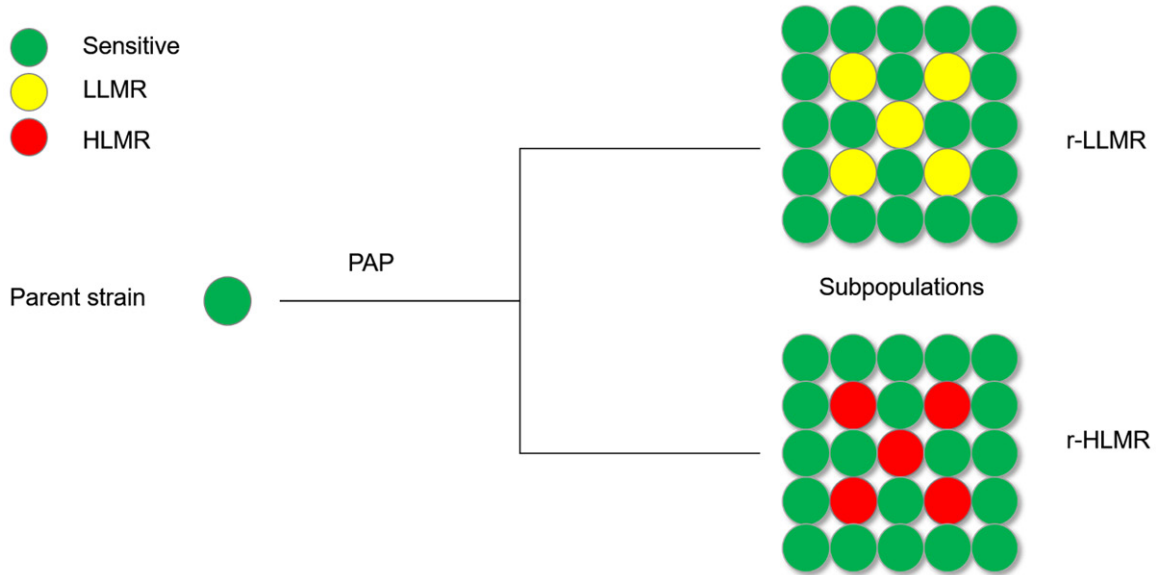

**Supplementary Figure 1.** Heterogeneous mupirocin resistance modes of *S. aureus*. Note: LLMR: Low-Level Mupirocin Resistance; HLMR: High-Level Mupirocin Resistance; PAP: Population Analysis Profiling; r-LLMR: hetero-LLMR; r-HLMR: hetero-HLMR.

**Supplementary Table 1.** Stability of resistance to mupirocin of heterogeneous mupirocin resistant subpopulations

| Subpopulations | Molecular types | Mutations in <i>gyrA</i> gene | Generations of subculture on TSA plates without antibiotics |     |      |      |      |      |      |      |      |      |      |    |
|----------------|-----------------|-------------------------------|-------------------------------------------------------------|-----|------|------|------|------|------|------|------|------|------|----|
|                |                 |                               | 0th                                                         | 5th | 10th | 15th | 20th | 25th | 30th | 35th | 40th | 45th | 50th |    |
| r-314-5        | ST59-t437       | A637G                         | >4                                                          | >4  | >4   | >4   | >4   | >4   | >4   | >4   | >4   | >4   | >4   | >4 |
| r-314-6        | MRSA            | A637G                         | >4                                                          | >4  | >4   | >4   | >4   | >4   | >4   | >4   | >4   | >4   | >4   | >4 |
| r-314-7        |                 | A637G, G1762T                 | >4                                                          | >4  | >4   | >4   | >4   | >4   | >4   | >4   | >4   | >4   | >4   | >4 |
| r-169-1        | ST239-t030      | A637G                         | >4                                                          | >4  | ≤2   | ≤2   | ≤2   | ≤2   | ≤2   | ≤2   | ≤2   | ≤2   | ≤2   | ≤2 |
| r-169-2        | MRSA            | A637G                         | >4                                                          | >4  | ≤2   | ≤2   | ≤2   | ≤2   | ≤2   | ≤2   | ≤2   | ≤2   | ≤2   | ≤2 |
| r-169-3        |                 | A637G                         | >4                                                          | >4  | ≤2   | ≤2   | ≤2   | ≤2   | ≤2   | ≤2   | ≤2   | ≤2   | ≤2   | ≤2 |
| r-169-4        |                 | A637G                         | >4                                                          | >4  | >4   | ≤2   | ≤2   | ≤2   | ≤2   | ≤2   | ≤2   | ≤2   | ≤2   | ≤2 |
| r-301-1        | ST59-t437       | A637G                         | >4                                                          | >4  | >4   | >4   | >4   | >4   | >4   | >4   | >4   | >4   | >4   | >4 |
| r-301-2        | MRSA            | A637G                         | >4                                                          | >4  | ≤2   | ≤2   | ≤2   | ≤2   | ≤2   | ≤2   | ≤2   | ≤2   | ≤2   | ≤2 |
| r-171-1        | ST239-t030      | A637G                         | >4                                                          | >4  | >4   | ≤2   | ≤2   | ≤2   | ≤2   | ≤2   | ≤2   | ≤2   | ≤2   | ≤2 |
| r-171-2        | MRSA            | A637G                         | >4                                                          | >4  | >4   | >4   | >4   | >4   | >4   | >4   | >4   | >4   | >4   | >4 |
| r-171-3        |                 | A637G                         | >4                                                          | ≤2  | ≤2   | ≤2   | ≤2   | ≤2   | ≤2   | ≤2   | ≤2   | ≤2   | ≤2   | ≤2 |
| r-826-5        | ST5662-t2460    | A637G, G1762T                 | >4                                                          | >4  | >4   | >4   | >4   | >4   | >4   | >4   | ≤2   | ≤2   | ≤2   | ≤2 |
| r-826-6        | MRSA            | A637G, G1762T                 | >4                                                          | >4  | >4   | >4   | >4   | >4   | >4   | >4   | >4   | >4   | >4   | >4 |
| r-826-7        |                 | A637G, G1762T                 | >4                                                          | >4  | >4   | >4   | >4   | >4   | >4   | >4   | >4   | >4   | >4   | >4 |
| r-275-2        | ST239-t030      | A637G, G1762T                 | >4                                                          | >4  | >4   | >4   | >4   | >4   | >4   | ≤2   | ≤2   | ≤2   | ≤2   | ≤2 |
| r-275-3        | MRSA            | A637G, G1762T                 | >4                                                          | >4  | >4   | >4   | >4   | >4   | >4   | >4   | >4   | >4   | >4   | ≤2 |
| r-275-4        |                 | A637G, G1762T                 | >4                                                          | >4  | >4   | >4   | >4   | >4   | >4   | >4   | >4   | >4   | >4   | >4 |
| r-275-5        |                 | A637G, G1762T                 | >4                                                          | >4  | >4   | >4   | >4   | >4   | >4   | >4   | >4   | >4   | >4   | >4 |
| r-984-1        | ST59-t437       | A637G, G1762T                 | >4                                                          | >4  | >4   | >4   | >4   | >4   | >4   | >4   | >4   | >4   | >4   | >4 |
| r-984-2        | MRSA            | A637G, G1762T                 | >4                                                          | >4  | >4   | >4   | >4   | >4   | >4   | >4   | >4   | >4   | >4   | >4 |
| r-984-3        |                 | A637G, G1762T                 | >4                                                          | >4  | >4   | >4   | >4   | >4   | >4   | >4   | >4   | >4   | >4   | >4 |
| r-724-1        | ST398-t571      | A637G, G1762T                 | >4                                                          | >4  | >4   | >4   | >4   | >4   | >4   | >4   | >4   | >4   | >4   | >4 |
| r-724-2        | MSSA            | A637G                         | >4                                                          | >4  | >4   | >4   | >4   | >4   | >4   | ≤2   | ≤2   | ≤2   | ≤2   | ≤2 |
| r-315-1        | ST 59-t437      | A637G                         | >4                                                          | >4  | >4   | >4   | >4   | >4   | >4   | >4   | >4   | >4   | >4   | >4 |
| r-315-2        | MRSA            | A637G                         | >4                                                          | >4  | >4   | >4   | >4   | >4   | >4   | >4   | >4   | >4   | >4   | >4 |
| r-315-3        |                 | A637G                         | >4                                                          | >4  | ≤2   | ≤2   | ≤2   | ≤2   | ≤2   | ≤2   | ≤2   | ≤2   | ≤2   | ≤2 |

TSA: Tryptone Soya Agar; MSSA: Methicillin-Susceptible *Staphylococcus Aureus*; MRSA: Methicillin-Resistant *Staphylococcus Aureus*.
